# Supplementary material for: Epitope Mapping of the Diphtheria Toxin and Development of an ELISA-Specific Diagnostic Assay
Source: Preprints.org preprint supplement (doi:10.20944/preprints202103.0328.v1), 2021-03-11
Supplement: Supplementary file 1 [file supplementary]

**Table S1:** List of synthesized peptides covering the entire sequence of DTx. (F3,F4,F5, F11,F12,F13 positive controls and F9,F17 negative controls.

| Spot | Sequence          | Spot | Sequence         | Spot | Sequence         |
|------|-------------------|------|------------------|------|------------------|
| A1   | GS GSGMSRKL FASIL | B1   | VLALKVDNAETIKKE  | C1   | DKTKTKIESLKEHGP  |
| A2   | MSRKL FASILIGALL  | B2   | VDNAETIKKELGLSL  | C2   | KIESLKEHGPIKNKM  |
| A3   | FASILIGALLGIGAP   | B3   | TIKKELGLSLTEPLM  | C3   | KEHGPIKNKMSESPN  |
| A4   | IGALLGIGAPPSAHA   | B4   | LGLSLTEPLMEQVGT  | C4   | IKNKMSESPNKTVSE  |
| A5   | GIGAPPSAHAGADDV   | B5   | TEPLMEQVGTEEFIK  | C5   | SESPNKTVSEEKAKQ  |
| A6   | PSAHAGADDVVDSSK   | B6   | EQVGTEEFIKRFGDG  | C6   | KTVSEEKAKQYLEEF  |
| A7   | GADDVVDSSKSFVME   | B7   | EEFIKRFGDGASRVV  | C7   | EKAKQYLEEFHQ TAL |
| A8   | VDSSKSFVMENFSSY   | B8   | RFGDGASRVVLSLPF  | C8   | YLEEFHQTALEHPEL  |
| A9   | SFVMENFSSYHG TKP  | B9   | ASRVVLSLPFAEGSS  | C9   | HQTALEHPELSELKT  |
| A10  | NFSSYHG TKPGYVDS  | B10  | LSLPFAEGSSSVEYI  | C10  | EHPELSELKTVTGTN  |
| A11  | HG TKPGYVDSIQKGI  | B11  | AEGSSSVEYINNWEQ  | C11  | SELKTVTGTNPVFAG  |
| A12  | GYVDSIQKGIQPKS    | B12  | SVEYINNWEQAKALS  | C12  | VTGTNPVFAGANYAA  |
| A13  | IQKGIQKPKSGTQGN   | B13  | NNWEQAKALSVELEI  | C13  | PVFAGANYAAWAVNV  |
| A14  | QKPKSGTQGNYDDDW   | B14  | AKALSVELEINFETR  | C14  | ANYAAWAVNVAQVID  |
| A15  | GTQGNYDDDWKGFYS   | B15  | VELEINFETRGRGQ   | C15  | WAVNVAQVIDSETAD  |
| A16  | YDDDWKGFYSTDNKY   | B16  | NFETRGRGQDAMYE   | C16  | AQVIDSETADNLEKT  |
| A17  | KGFYSTDNKYDAAGY   | B17  | GKRGQDAMYEYMAQA  | C17  | SETADNLEKTTAALS  |
| A18  | TDNKYDAAGYSVDNE   | B18  | DAMYEYMAQACAGNR  | C18  | NLEKTTAALSILPGI  |
| A19  | DAAGYSVDNENPLSG   | B19  | YMAQACAGNRVRRSV  | C19  | TAALSILPGIGSVMG  |
| A20  | SVDNENPLSGKAGGV   | B20  | CAGNRVRRSVGSSLS  | C20  | ILPGIGSVMGIADGA  |
| A21  | NPLSGKAGGVVKVTY   | B21  | VRRSVGSSLSCLND   | C21  | GSMGIADGAVHHNT   |
| A22  | KAGGVVKVTYPGLTK   | B22  | GSSLSCLNDWDVIR   | C22  | IADGAVHHNTEEIVA  |
| A23  | VKVTYPGLTKVLALK   | B23  | CINLDWDVIRDKTKT  | C23  | VHHNTEEIVAQSIAL  |
| A24  | PGLTKVLALKVDNAE   | B24  | WDVIRDKTKTKIESL  | C24  | EEIVAQSIALSSLMV  |
|      |                   |      |                  |      |                  |
| D1   | QSIALSSLMVAQAIP   | E1   | SVNGRKIRMRCRAID  | F1   |                  |
| D2   | SSLMVAQAIPLVGEL   | E2   | KIRMRCRAIDGDVTF  | F2   |                  |
| D3   | AQAIPLVGELVDIGF   | E3   | CRAIDGDVTFCRPKS  | F3   | KEVPALTAVETGATN  |
| D4   | LVGELVDIGFAAYNF   | E4   | GDVTFCRPKSPVYVG  | F4   |                  |
| D5   | AAYNFVESIINFVSI   | E5   | CRPKSPVYVGNGVHA  | F5   | GYPKDGNFNNLDRI   |
| D6   | AAYNFVESIINFVSI   | E6   | PVYVGNGVHANLHVA  | F6   |                  |
| D7   | VESIINFVSIINLFQV  | E7   | NGVHANLHVAFHRSS  | F7   | YDYDVPDYAGYPYDV  |
| D8   | NLFQVVHNSYNRPAY   | E8   | NLHVAFHRSSSEKIH  | F8   |                  |
| D9   | VHNSYNRPAYSPGHK   | E9   | FHRSSSEKIHSNEIS  | F9   | QEV RKYFCV       |
| D10  | NRPAYSPGHKTQPFL   | E10  | SEKIHSNEISSDSIG  | F10  |                  |
| D11  | SPGHKTQPFLHDGYA   | E11  | SNEISSDSIGVLGYQ  | F11  | KEVPALTAVETGATN  |
| D12  | TQPFLHDGYAVSWNT   | E12  | SDSIGVLGYQKTVDH  | F12  |                  |
| D13  | HDGYAVSWNTVEDSI   | E13  | VLGYQKTVDH TKVNS | F13  | GYPKDGNFNNLDRI   |
| D14  | VSWNTVEDSIIRTGF   | E14  | KTVDH TKVNSKLSLF | F14  |                  |
| D15  | VEDSIIRTGFQGESG   | E15  | TKVNSKLSLFFFEIKS | F15  | YDYDVPDYAGYPYDV  |
| D16  | IRTGFQGESGHDIKI   | E16  | KLSLFFFEIKSGSGSG | F16  |                  |
| D17  | QGESGHDIKITAENT   | E17  |                  | F17  | QEV RKYFCV       |
| D18  | HDIKITAENTPLPIA   | E18  |                  | F18  |                  |
| D19  | TAENTPLPIAGVLLP   | E19  |                  | F19  |                  |
| D20  | PLPIAGVLLPTIPGK   | E20  |                  | F20  |                  |
| D21  | GVLLPTIPGKLDV NK  | E21  |                  | F21  |                  |
| D22  | TIPGKLDV NKSKTHI  | E22  |                  | F22  |                  |
| D23  | LDV NKSKTHISVNGR  | E23  |                  | F23  |                  |
| D24  | SKTHISVNGRKIRMR   | E24  |                  | F24  |                  |

**Figure S1:** Alignment of the primary structure of DTx [(1-*C. diphtheria* (Q6NK15), 2-*C. ulcerans* (AQA1Y0 HBB0) and 3-*C. pseudotuberculosis* (WP\_014654963.1)] showing in grey the epitopes (CB/DTx1-20) identified by Spot-synthesis.

|                                                      |             |            |             |            |            |              |              |            |
|------------------------------------------------------|-------------|------------|-------------|------------|------------|--------------|--------------|------------|
|                                                      | 10          | 20         | 30          | 40         | 50         | 60           | 70           | 80         |
| 1-MSRKL                                              | FASIL       | IGALLGIGAP | PSAHAGADDV  | VDSSKSFVME | NFSSYHGTP  | GYVDSIQKGI   | QKPKSGTQGN   | YDDDWKGFYS |
| 2-MNRKL                                              | FASIL       | IGALLGIGTP | LSAHASADDV  | VDSSKSFVME | NFSSYHGTP  | GYVDSIQKGI   | QKPKSGTQGN   | YDDDWKGFYS |
| 3-MNRKL                                              | FALIL       | IGALLGIGAP | LSAHASVDDV  | VDSSKSFVME | NFSSYHGTP  | GYVDSIQKGI   | QKPKSGTQGN   | YDDDWKGFYS |
| -----CB/Tx-1-----CB/Tx-2-----CB/Tx-3-----CB/Tx-4     |             |            |             |            |            |              |              |            |
|                                                      | 90          | 100        | 110         | 120        | 130        | 140          | 150          | 160        |
| 1-TDNKYDAAGY                                         | SVDNENPLSG  | KAGGVVKVTY | PGLTKVLALK  | VDNAETIKKE | LGLSLTEPLM | EQVGTEEFIK   | RFGDGASRVV   |            |
| 2-TDNKYDAAGY                                         | SVDNENPLSG  | KAGGVVKVTY | PGLTKILALK  | VDNAETIKKE | LGLSLTEPLM | EQVGSEEFIK   | RFGDGASRVV   |            |
| 3-TDNKYDAAGY                                         | SVDNENPLSG  | KAGGVVKVTY | PGLTKILALK  | VDNAETIKKE | LGLSLTEPLM | EQVGSEEFIK   | RFGDGASRVV   |            |
| -----CB/Tx-5-----CB/Tx-6-----CB/Tx-7                 |             |            |             |            |            |              |              |            |
|                                                      | 170         | 180        | 190         | 200        | 210        | 220          | 230          | 240        |
| 1-LSLPFAEGSS                                         | SVEYINNWEQ  | AKALSVELEI | NFETRGRKRGQ | DAMYEYMAQA | CAGNRVRRSV | GSSLSCLNLD   | WDVIRDKTKT   |            |
| 2-LSLPFAEGSS                                         | SVEYINNWEQ  | AKALSVELEI | NFETRGRKRGQ | DAMYEYMAQS | CAGNRVRRSV | GNSSSCLNLD   | WDAIRDKTKT   |            |
| 3-LSLPFAEGSS                                         | SVEYINNWEQ  | AKALSVELEI | NFENRGRKRGQ | DAMYEYMAQS | CAGNRIRRSV | SNSSSCLNLD   | WDAIRDKTKA   |            |
| -----CB/Tx-8-----CB/Tx-9-----CB/Tx-10-----CB/Tx-11   |             |            |             |            |            |              |              |            |
|                                                      | 250         | 260        | 270         | 280        | 290        | 300          | 310          | 320        |
| 1-KIESLKEHGP                                         | IKNKMSESPN  | KTVSEEKAKQ | YLEEFHQ TAL | EHPSELSELT | VTGTNPVFAG | ANYA AWA VNV | AQVIDSETAD   |            |
| 2-KIESLKEHGP                                         | IKNKMSESPN  | KAVSEEKAKQ | YLEEFHQ TAL | EHPSELSELT | VTGTNSVFAG | ANYA AWA VNV | AQVIDSETAD   |            |
| 3-KIESLKENG P                                        | IKNKMSESPN  | KTVSEEKAKQ | YLEEFHQ TAL | EHPSELSELT | VAETNSVFAG | ANYA AWA VNV | AQVIDSKTAD   |            |
| -----CB/Tx-10-----CB/Tx-11-----CB/Tx-12-----CB/Tx-13 |             |            |             |            |            |              |              |            |
|                                                      | 330         | 340        | 350         | 360        | 370        | 380          | 390          | 400        |
| 1-NLEKTTAALS                                         | ILPGIGSVMG  | IADGAVHHNI | EEIVAQSIAL  | SSLMVAQAIP | LVGELVDIGF | AAYNFVESII   | NLFQVVHNSY   |            |
| 2-NLEKTTAALS                                         | ILPGIGSVMG  | IADGAVHHNT | EEIVAQSIAL  | SSLMVAQAIP | LVGELVDIGF | AAYNFVESII   | NLFQVVHNSY   |            |
| 3-NLEKTTAALS                                         | ILPGIGSVMG  | IADGAVHHNT | EEIVAQSIAL  | SSLMIAQAIP | LVGELVDIGF | AAYNFVESII   | NLFQVVIHNSY  |            |
| -----CB/Tx-14-----CB/Tx-15-----CB/Tx-16-----CB/Tx-17 |             |            |             |            |            |              |              |            |
|                                                      | 410         | 420        | 430         | 440        | 450        | 460          | 470          | 480        |
| 1-NRPAYSPGHK                                         | TQPFLHDGYA  | VSWNTVEDSI | IRTGFQGESG  | HDIKITAENT | PLPIAGVLLP | TIPGKLDV NK  | SKTHISVNGR   |            |
| 2-NRPAYSPGHK                                         | TQPFLHDGYA  | VSWNTVEDSI | IQTGFQGESG  | HDIKITAENT | PLPIAGVLLP | TIPGKLDV NK  | SKTHISVNGR   |            |
| 3-NRPYSPGHK                                          | TQPFLHDGYA  | VSWNTVEDSI | IKTGFQGESG  | HDIKITAENT | PLPIAGVLLP | TITGKLDV NK  | SKTHISVNGR   |            |
| -----CB/Tx-16-----CB/Tx-17-----CB/Tx-18-----CB/Tx-19 |             |            |             |            |            |              |              |            |
|                                                      | 490         | 500        | 510         | 520        | 530        | 540          | 550          | 560        |
| 1-KIRMRCAID                                          | GDVTF CRPKS | PVYVGNGVHA | NLHVAFHRSS  | SEKIHSNEIS | SDSIGVLGYQ | KTV DHTK VNS | KL SLFF EIKS |            |
| 2-KIRMRCAID                                          | GDVTF CRPKS | PVYVGNGVHA | NLHVAFHRSS  | SEKIHSNEIS | SDSIGVLGYQ | KIV DHTK VNS | KL SLFF EIKS |            |
| 3-KIRMQCAID                                          | GNVTF CRPKS | PVYVGKGVHA | NLHVAFHRSN  | SEKIQSNEIL | SDSIGILGYQ | KIV DHTK VNS | KL SLFF EIKS |            |
| -----CB/Tx-19-----CB/Tx-20-----CB/Tx-21              |             |            |             |            |            |              |              |            |
